# Supplementary material for: Exploring the temperature stability of CRISPR-Cas12b using molecular dynamics simulations
Source: Royal Society of Chemistry journal article supplement (doi:10.1039/d5me00140d), 2025-10-30
Supplement: d5me00140d1.pdf [file d5me00140d1.pdf]

## Supporting Information for

### Exploring the Temperature Stability of CRISPR–Cas12b using Molecular Dynamics Simulations

Yinhao Jia<sup>1</sup>, Katelynn Horvath<sup>2</sup>, Santosh R. Rananaware<sup>1</sup>, Piyush K. Jain<sup>1,3,4</sup>, Janani Sampath<sup>1,\*</sup>

<sup>1</sup>Department of Chemical Engineering, University of Florida, Gainesville, FL, USA

<sup>2</sup> Department of Chemical and Biomolecular Engineering, University of Connecticut, Storrs, CT, USA

<sup>3</sup> Department of Molecular Genetics and Microbiology, College of Medicine, University of Florida,  
Gainesville, FL, USA

<sup>4</sup> Health Cancer Center, University of Florida, Gainesville, FL, USA

\* [jsampath@ufl.edu](mailto:jsampath@ufl.edu)

## Table of content

### Structure and Stability

Figure S1 BrCas12b domain assignment with detailed legend and sequence alignment

Figure S2 All to all RMSD plot for the assessment of sampling during the first 200ns equilibration simulation

Figure S3 Total number of Intra protein hydrogen bond and total solvent accessible surface area of WT and MT at 300 K and 400 K

### Secondary Structure Analysis

Figure S4 Secondary structure analysis of WT and MT at 300 K and 400 K

Figure S5 Predicted circular dichroism spectra using PDBMD2CD server

Table S1 Comparison of  $\alpha$ -helix and  $\beta$ -sheet content in BrCas12b

Figure S6 Snapshots of region nearby R160E mutation

### Domain Level Analysis

Figure S7 Backbone root mean squared deviation (RMSD) of each domain from WT and MT at 300 K and 400 K

Table S2 Statistics of RMSD from domains

Figure S8 Number of hydrogen bonds formed between the mutated residues and other residues of WT and MT at 300 K and 400 K

Figure S9 Solvent accessible surface area of mutation point

### **Principal Component Analysis**

Figure S10 Protein dynamics projected onto PC2 from WT and MT at 300 K and 400 K

Figure S11 Snapshots representing the open and closed states derived from PC1

Figure S12 Projections of the simulation trajectory onto first two principal components

Figure S13 Projections of the replicas simulation trajectory onto PC1-PC2 subspace

Figure S14 Cumulative contribution of all the principal components

## Structure and Stability

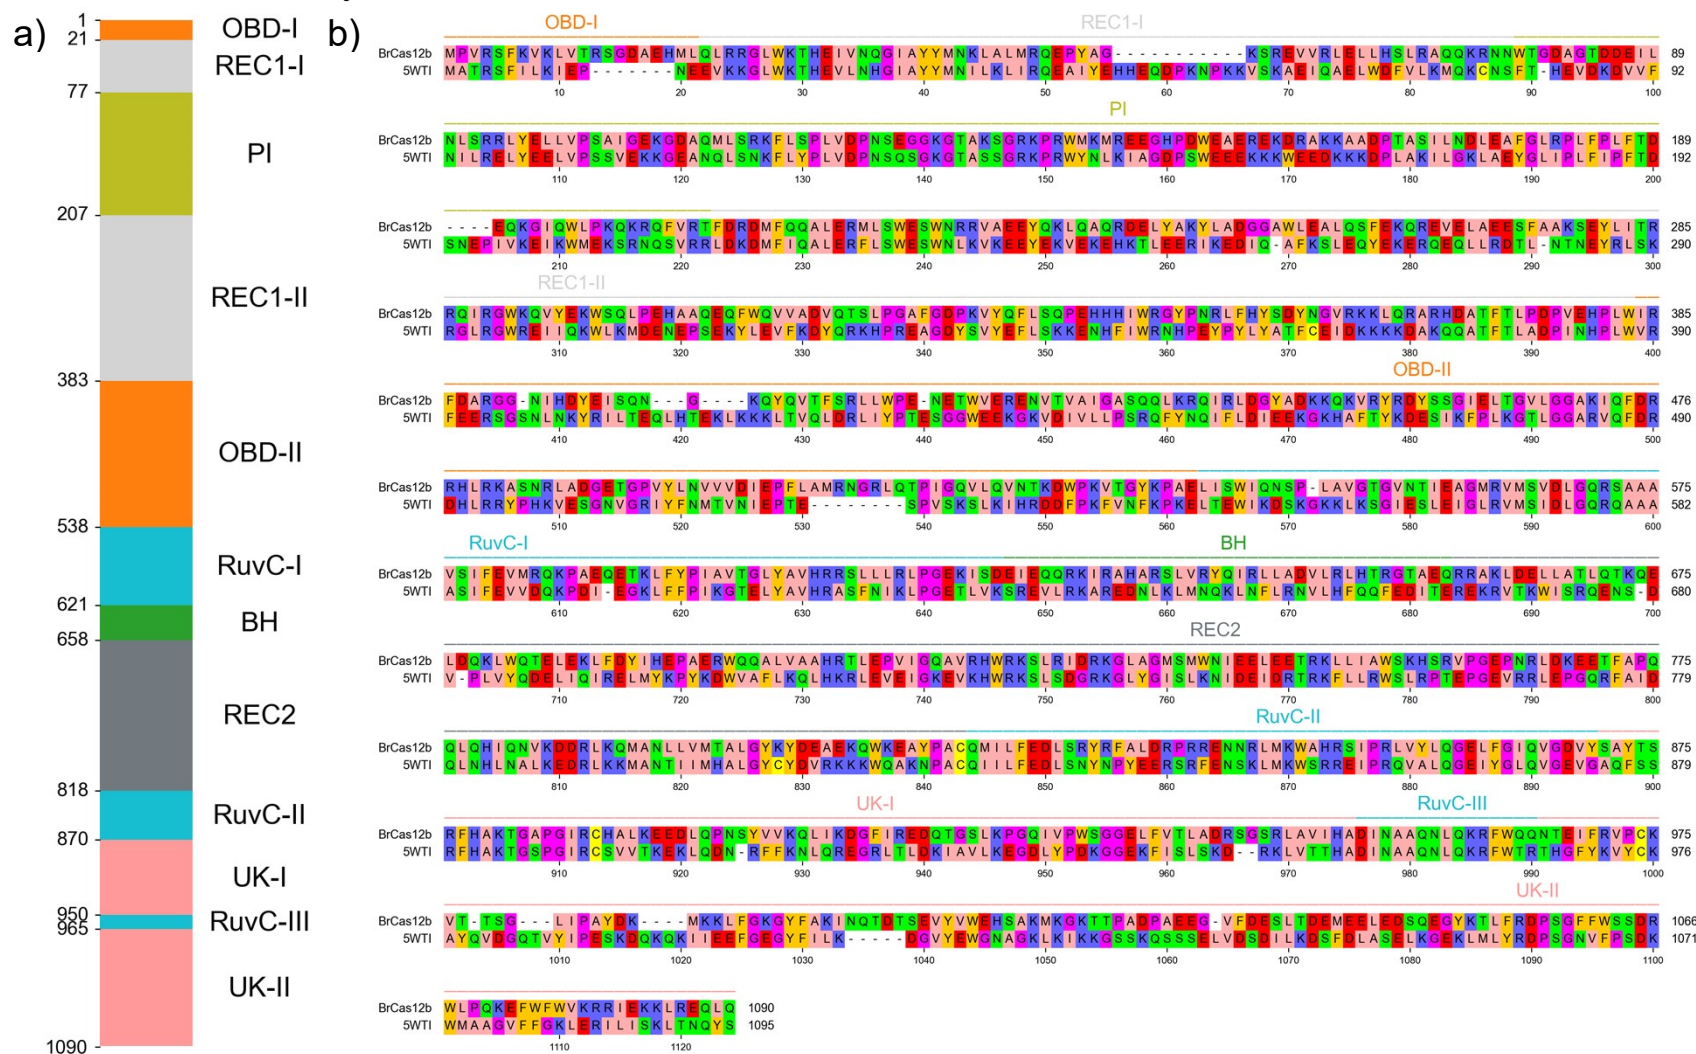

Figure S1. BrCas12b (a)domain assignment and (b)corresponding sequence alignment plotted using *pyMSAviz* package with the existing crystal structure of BthC2c1/BthCas12b (PDB: 5WTI)

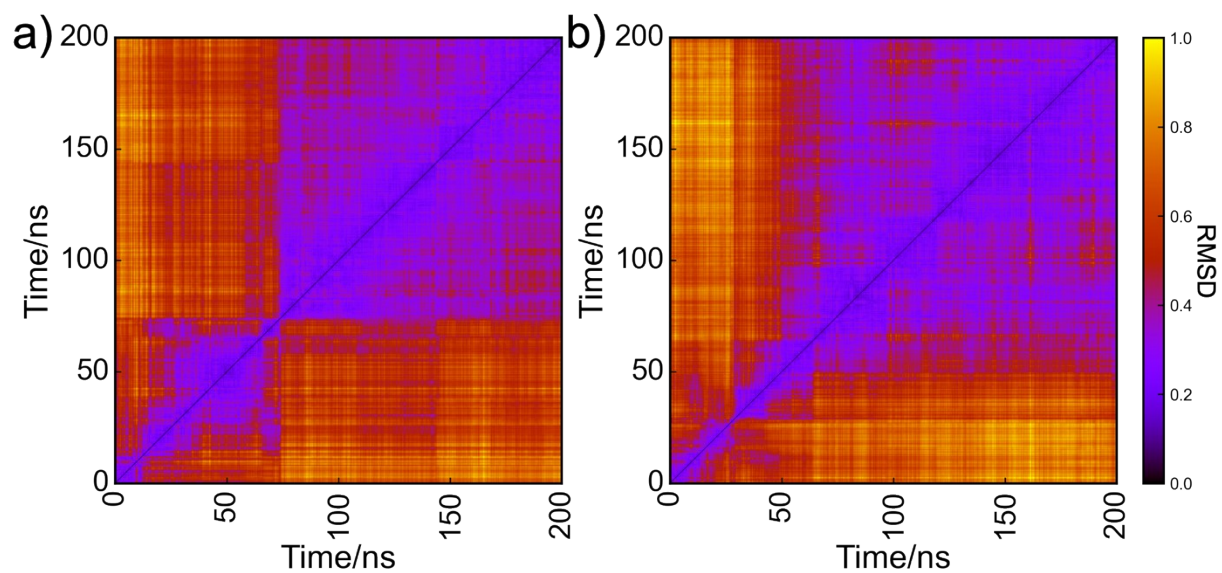

Figure S2. All-to-all RMSD matrix of (a) wild-type BrCas12b and (b) mutant-type BrCas12b at 300 K.

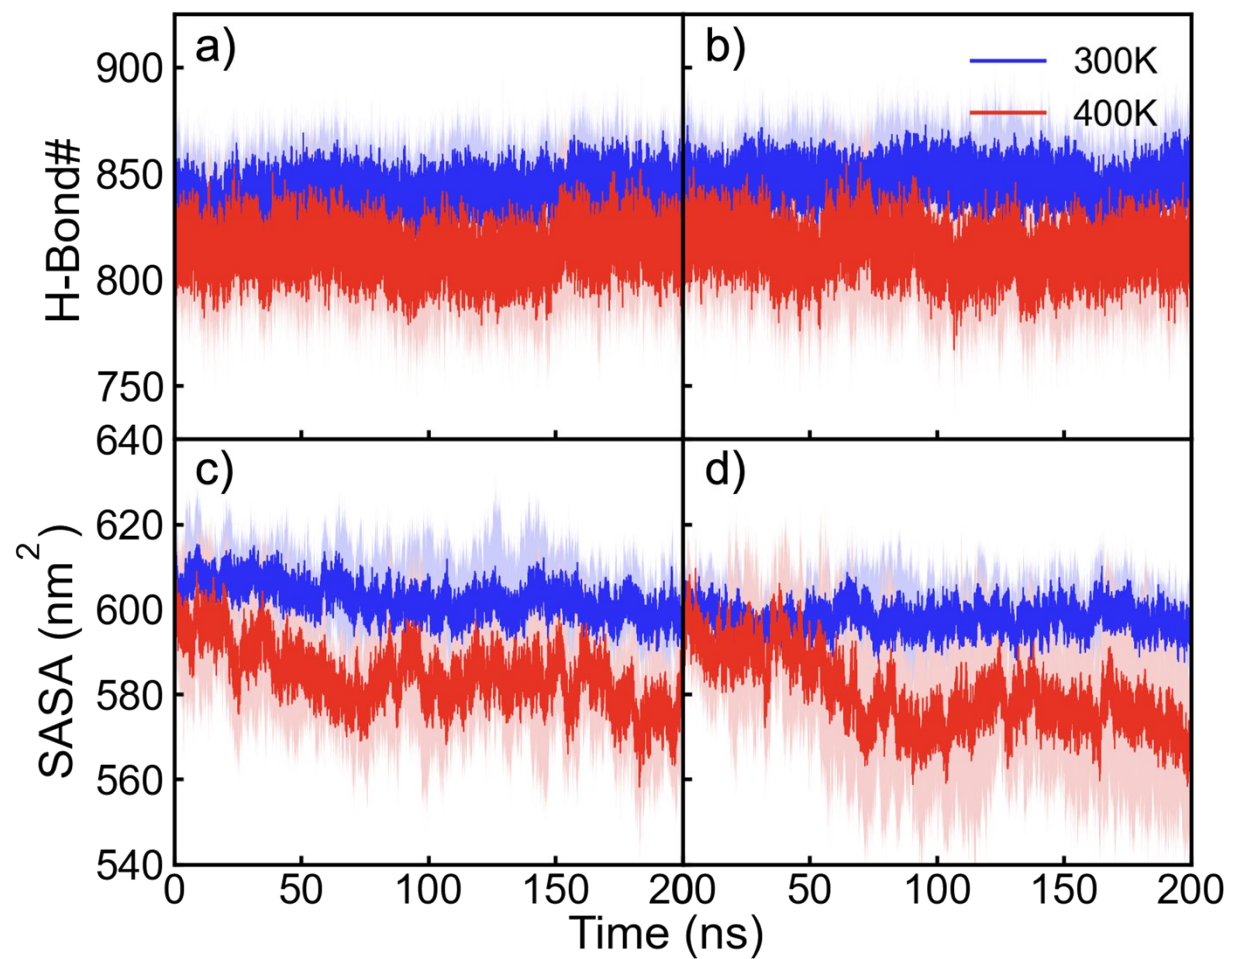

Figure S3. Intra protein hydrogen bond number (a, b) and total solvent accessible surface area (SASA) (c, d) of BrCas12b (a, c) wild type and (b, d) mutant type as a function of simulation time. The solid lines indicate values averaged over three independent replicas, while the shaded region indicates the error calculated from the four replicas.

## Secondary Structure Analysis

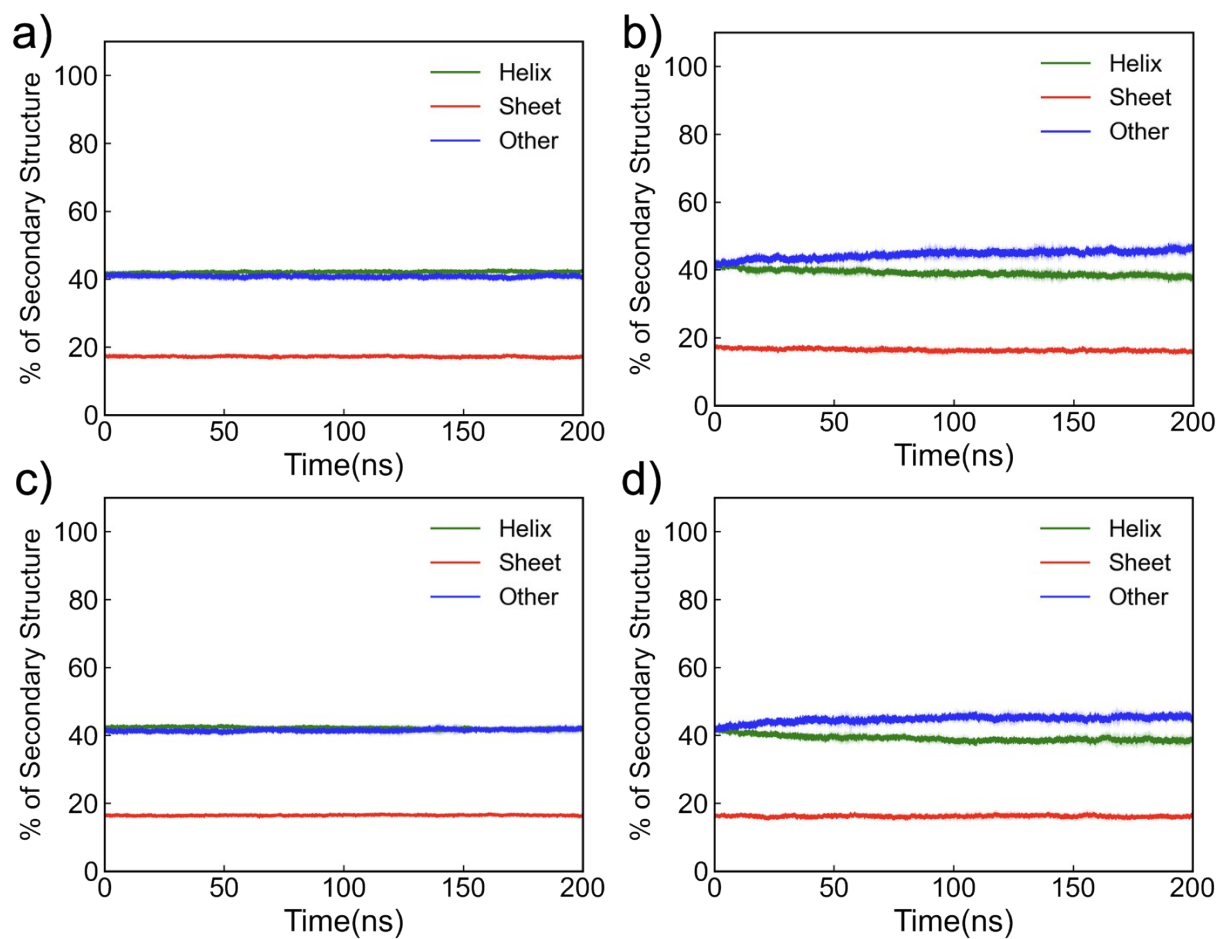

**Figure S4.** Secondary structure fraction of wild-type BrCas12b at (a) 300 K, (b) 400 K, and mutated-type BrCas12b at (c) 300 K, (d) 400 K. The solid lines indicate values averaged over three independent replicas, while the shaded region indicates the error bar calculated from the three replicas.



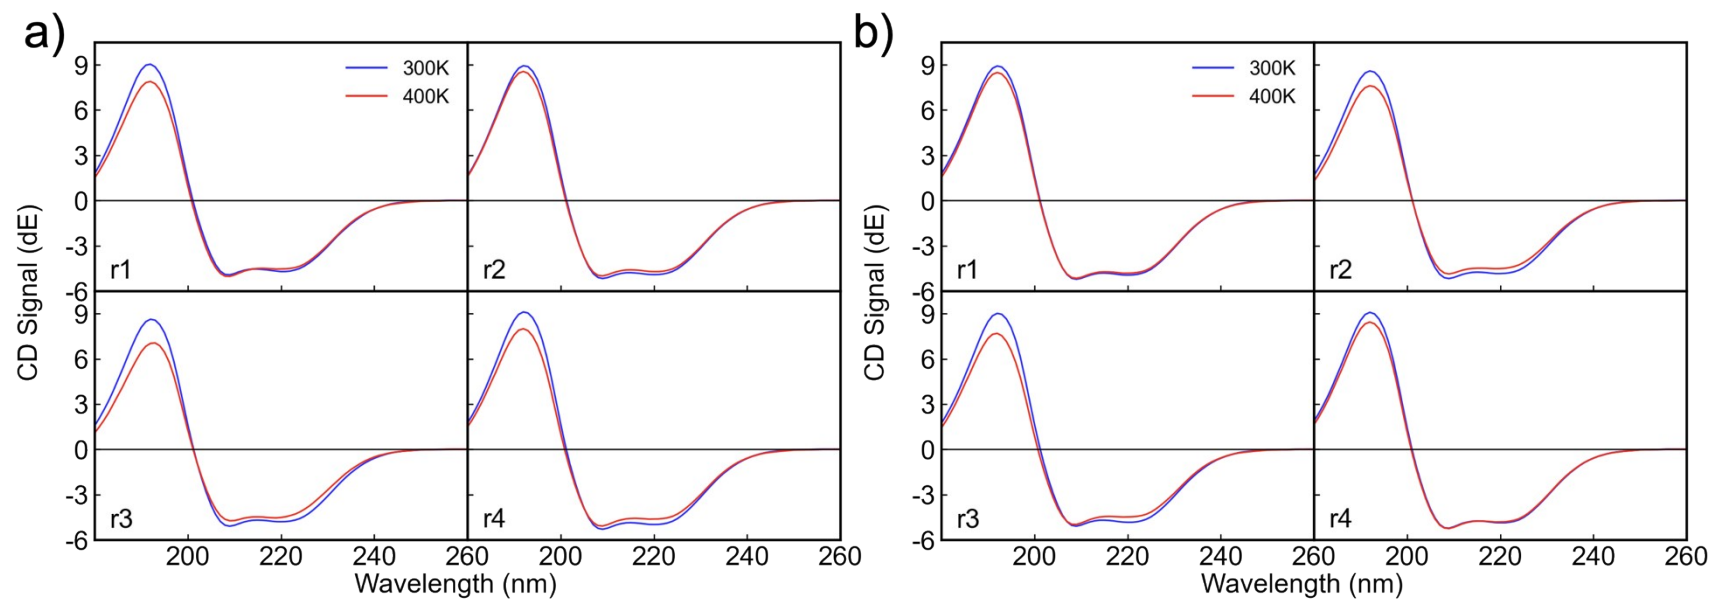

**Figure S5. Predicted circular dichroism (CD) spectra of (a) wild-type BrCas12b and (b) mutated-type BrCas12b at 300 and 400 K after 200 ns simulation for four replicates (r1 – r4).**

**Table S1. Comparison of  $\alpha$ -helix and  $\beta$ -sheet content in BrCas12b. The secondary structures of wild-type (WT) and mutant (MT) BrCas12b were analyzed from the last 100 ns of replicate simulations. These are compared with the secondary structures of existing Cas12b family crystal structures retrieved from the RCSB Protein Data Bank. All percentages were quantified using the STRIDE algorithm. Values for WT and MT BrCas12b represent the mean across replicates, with the standard deviation provided in parentheses.**

| PDB          | sequence identity % | total residues modeled | helix %     | sheet%      |
|--------------|---------------------|------------------------|-------------|-------------|
| 5WTI         | 41                  | 982                    | 44.6        | 16.29       |
| 5WQE         | 36                  | 1011                   | 42.63       | 18.49       |
| 5U30         | 36                  | 1085                   | 41.01       | 16.86       |
| 5U31         | 36                  | 1085                   | 41.01       | 16.86       |
| 5U33         | 36                  | 1085                   | 40.55       | 16.86       |
| 5U34         | 36                  | 960                    | 43.02       | 17.18       |
| 9KLN         | 27                  | 1385                   | 46.5        | 11.33       |
| 9KLO         | 27                  | 1396                   | 45.7        | 12.1        |
| 9KLP         | 27                  | 1268                   | 44.32       | 12.22       |
| 9KLQ         | 27                  | 1284                   | 44.94       | 11.06       |
| BrCas12b(WT) | /                   | 1090                   | 42.16(0.49) | 17.14(0.45) |
| BrCas12b(MT) | /                   | 1090                   | 41.90(0.75) | 16.49(0.40) |



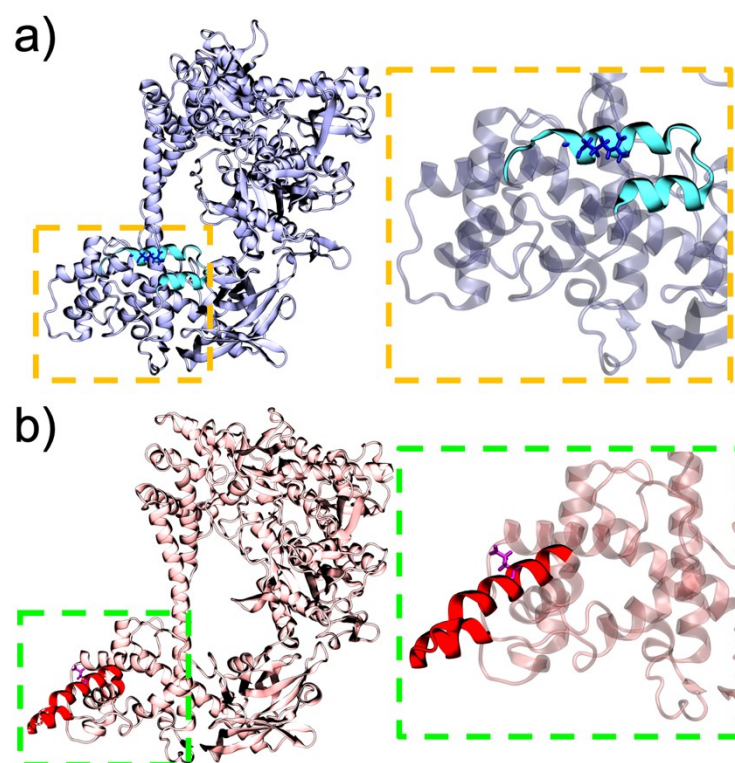

**Figure S6.** Snapshots of (a)WT and (b)MT BrCas12b at the end of the 200 ns simulation with the region near mutation R160E highlighted on the right.

## Domain Level Analysis

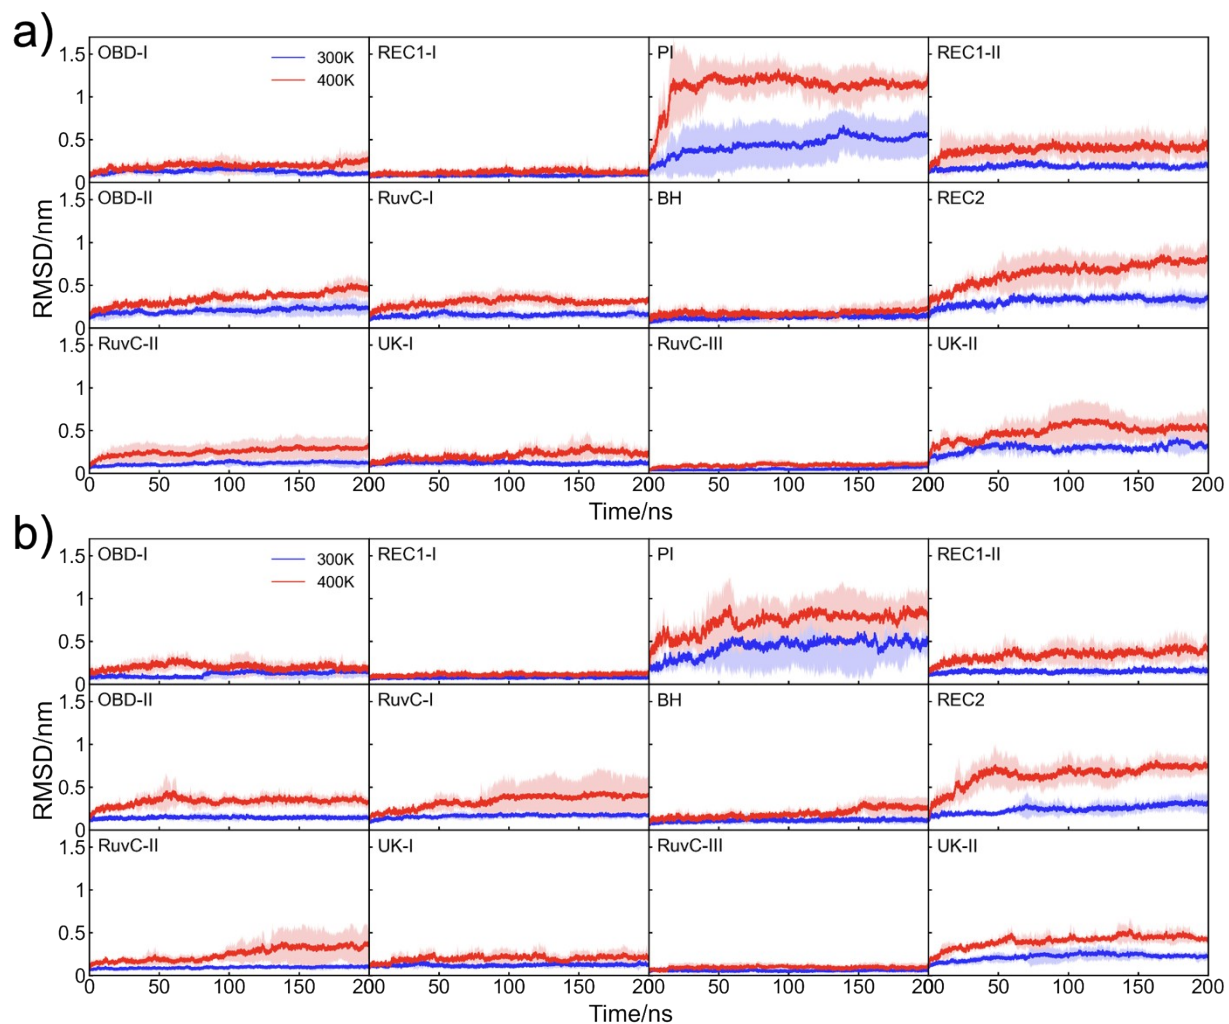

**Table S2. Mean root-mean-square deviation (RMSD) over the final 100 ns of 4 replicas. The table reports the average value and standard deviation (in parentheses) across the four replicates.**

| Domain   | Temperature | WT RMSD/nm     | MT RMSD/nm     | P Value |
|----------|-------------|----------------|----------------|---------|
| OBD1     | 300K        | 0.1216(0.0103) | 0.1376(0.0458) | 0.5226  |
| OBD1     | 400K        | 0.2052(0.0491) | 0.1959(0.0575) | 0.8143  |
| REC1-I   | 300K        | 0.0848(0.0041) | 0.0777(0.0054) | 0.0809  |
| REC1-I   | 400K        | 0.1261(0.0343) | 0.1162(0.0161) | 0.6194  |
| PI       | 300K        | 0.5125(0.2298) | 0.4891(0.2733) | 0.9002  |
| PI       | 400K        | 1.1488(0.1503) | 0.8022(0.2230) | 0.0419  |
| REC1-II  | 300K        | 0.1881(0.0190) | 0.1549(0.0216) | 0.0605  |
| REC1-II  | 400K        | 0.4091(0.1312) | 0.3735(0.1001) | 0.6814  |
| OBD-II   | 300K        | 0.2210(0.0703) | 0.1422(0.0164) | 0.0720  |
| OBD-II   | 400K        | 0.4015(0.0423) | 0.3458(0.0490) | 0.1361  |
| RuvC-I   | 300K        | 0.1560(0.0306) | 0.1709(0.0203) | 0.4497  |
| RuvC-I   | 400K        | 0.3165(0.0354) | 0.3931(0.2098) | 0.4983  |
| BH       | 300K        | 0.1355(0.0223) | 0.1136(0.0192) | 0.1871  |
| BH       | 400K        | 0.1815(0.0627) | 0.2311(0.0605) | 0.2982  |
| REC2     | 300K        | 0.3404(0.0480) | 0.2707(0.0603) | 0.1205  |
| REC2     | 400K        | 0.7320(0.1117) | 0.7061(0.0911) | 0.7313  |
| RuvC-II  | 300K        | 0.1245(0.0258) | 0.0986(0.0137) | 0.1269  |
| RuvC-II  | 400K        | 0.2833(0.1033) | 0.3167(0.1535) | 0.7306  |
| UK-I     | 300K        | 0.1149(0.0164) | 0.1244(0.0217) | 0.5144  |
| UK-I     | 400K        | 0.2434(0.0667) | 0.2057(0.0564) | 0.4210  |
| RuvC-III | 300K        | 0.0559(0.0218) | 0.0561(0.0090) | 0.9897  |
| RuvC-III | 400K        | 0.0999(0.0109) | 0.0925(0.0304) | 0.6617  |
| UK-II    | 300K        | 0.3113(0.0456) | 0.2391(0.0444) | 0.0636  |
| UK-II    | 400K        | 0.5450(0.1459) | 0.4460(0.0442) | 0.2416  |

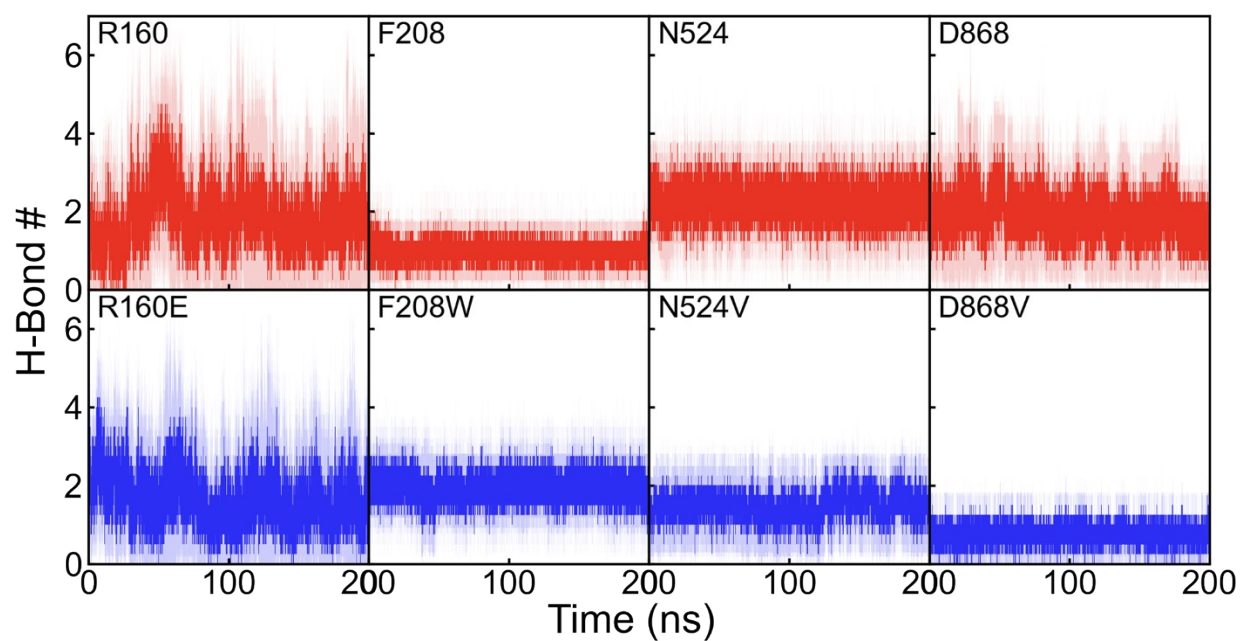

Figure S8. Number of hydrogen bond formed between the mutation point to other residues at 400 K, with each mutation point shown on the top left corner, as a function of simulation time. First row from wild-type, second row from mutated-type BrCas12b. The solid lines indicate values averaged over three independent replicas, while the shaded region indicates the error bar calculated from the four replicas.

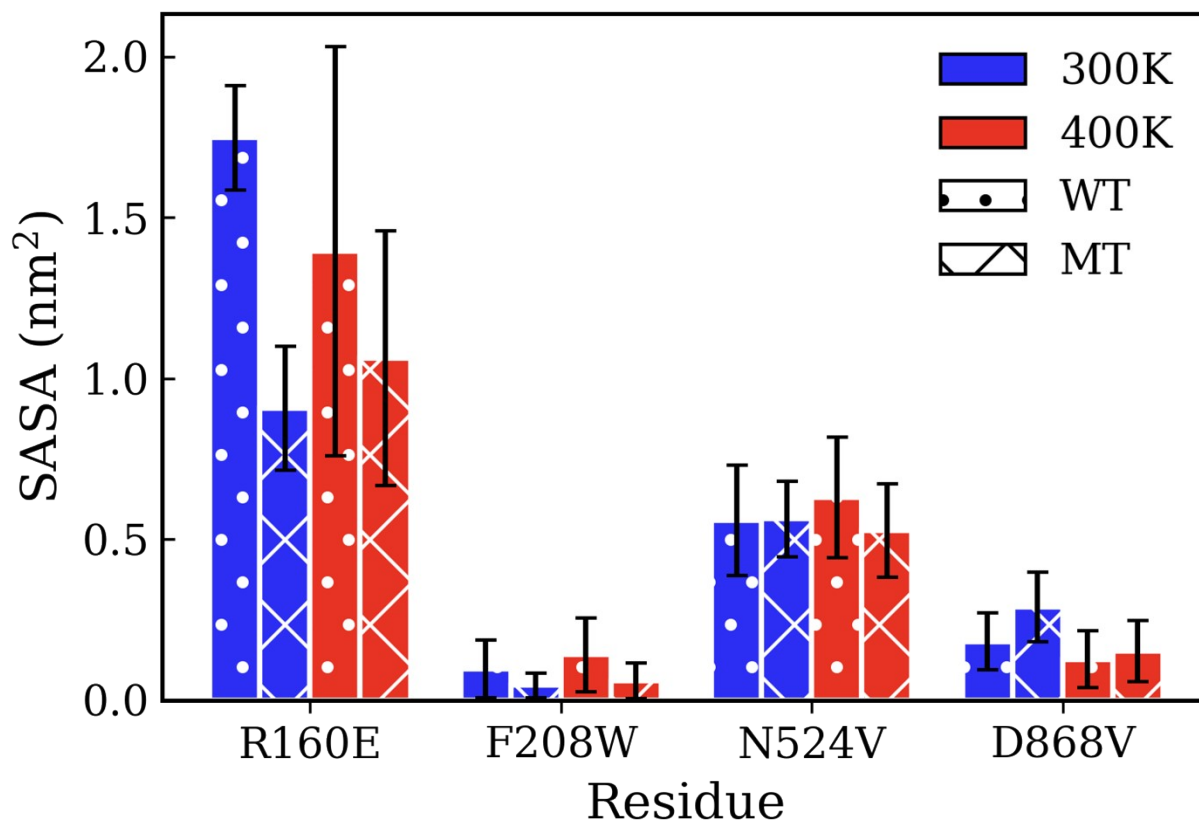

Figure S9. SASA of mutation point calculated from last 100ns of each simulation and averaged over 4 replicates. With error bar shown one standard deviation.

## Principal Component Analysis

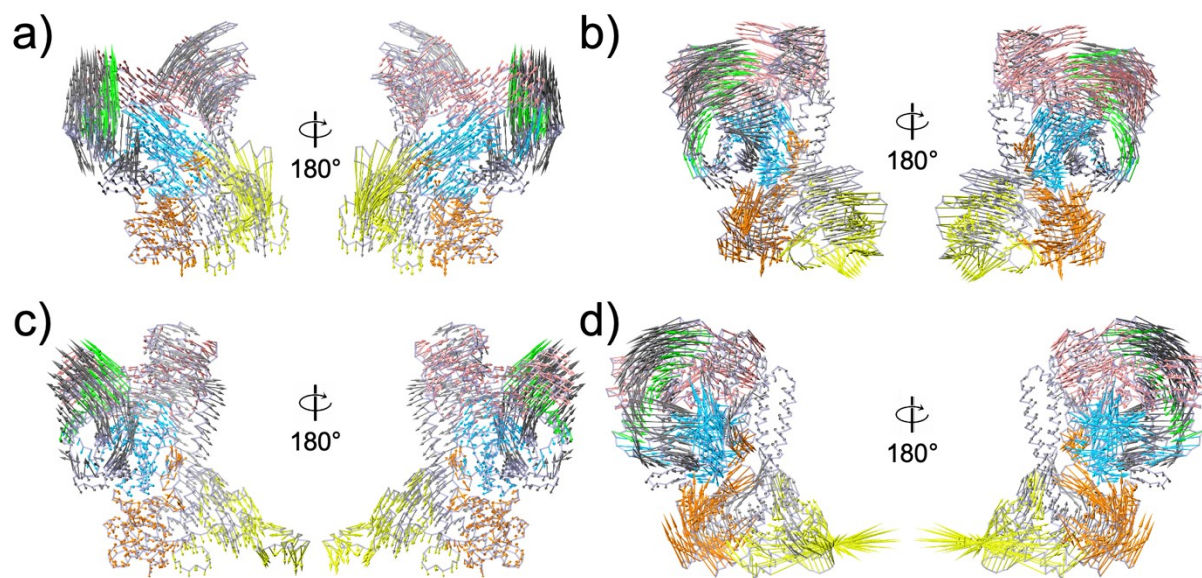

**Figure S10.** Motions obtained from principal component 2 (PC2) of wild-type BrCas12b at (a) 300 K, (b) 400 K, and mutated-type BrCas12b at (c) 300 K, (d) 400 K shown using arrows of sizes equivalent to the amplitude of motions, with colors adapted from Figure 1 to distinguish motions from different domains.



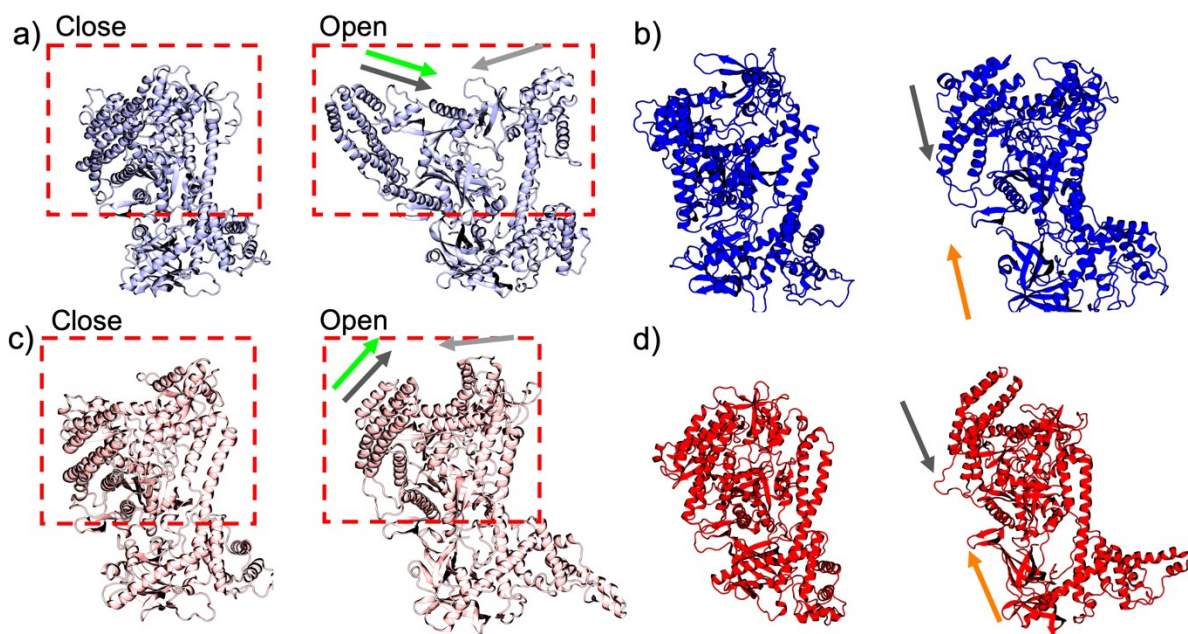

**Figure S11** Snapshots representing the open and closed states derived from the first principal component (PC1) of motion for the (a) Wild-Type (WT) at 300 K, (b) WT at 400 K, (c) Mutant (MT) at 300 K, and (d) MT at 400 K. Arrows depict the direction and amplitude of the collective motion captured by PC1.



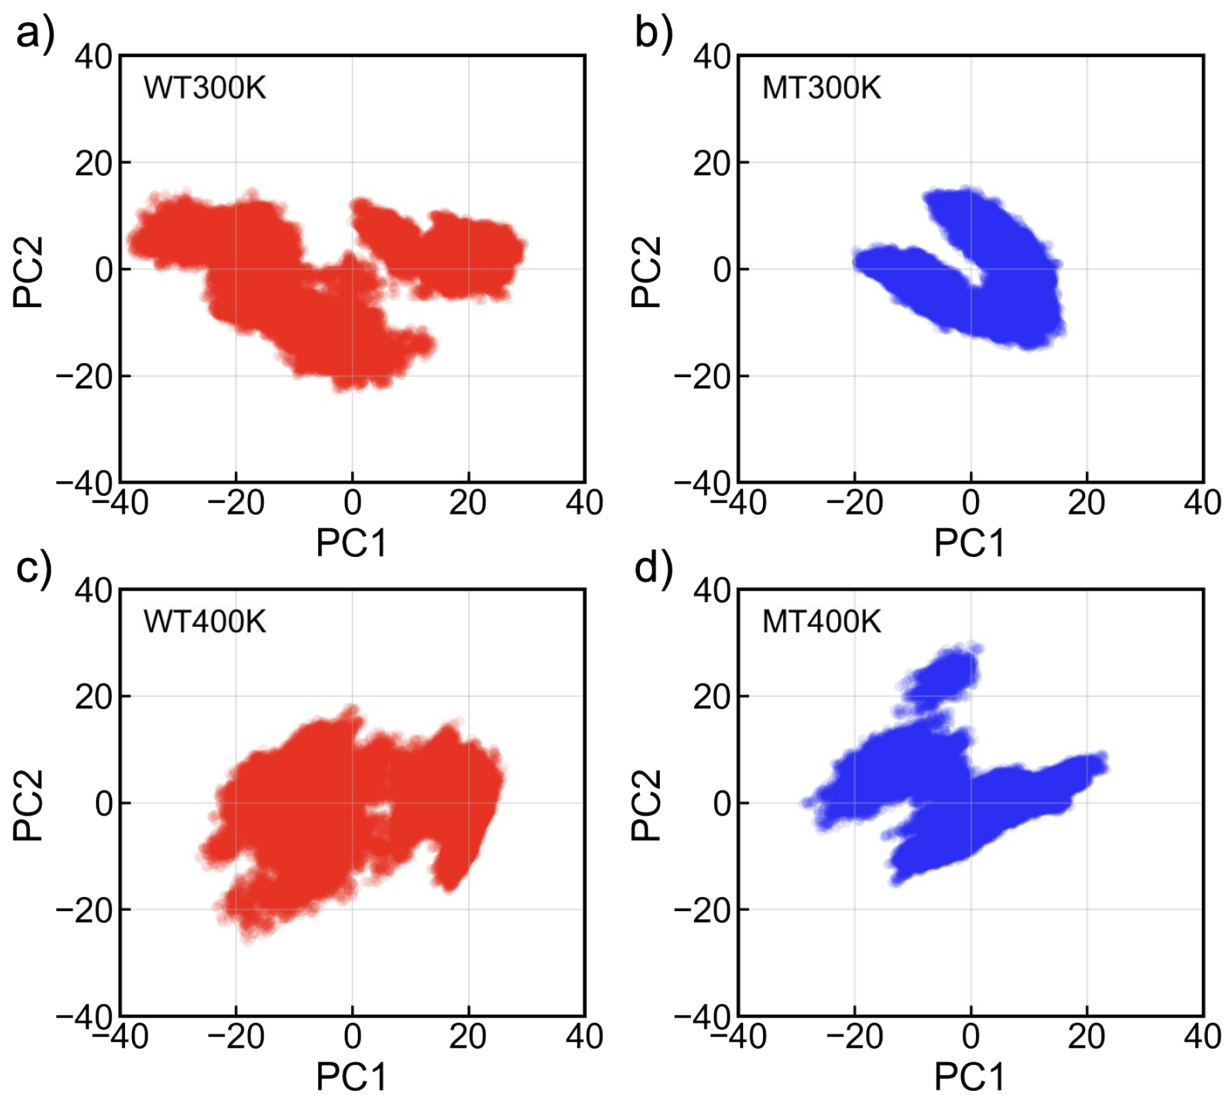

**Figure S12. Projections of the simulation trajectory onto first and second principal component derived from (a) wild type BrCas12b at 300 K, (b) mutated type BrCas12b at 300 K, (c) wild type BrCas12b at 400 K, and (d) mutated type BrCas12b at 400 K.**

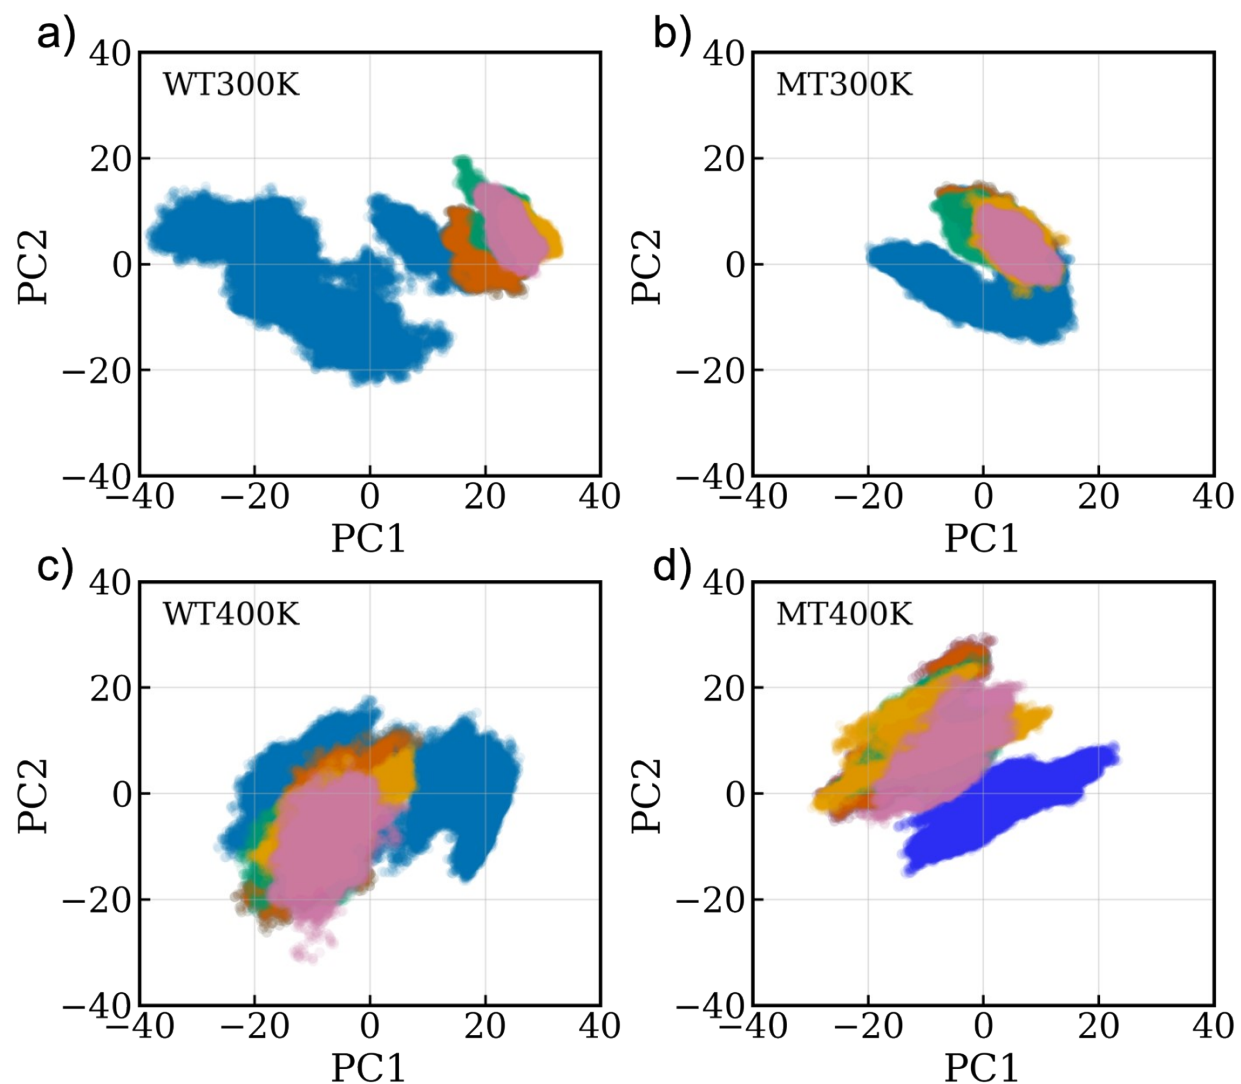

**Figure S13.** Projections of the replicas simulation trajectory onto first and second principal component derived from 1  $\mu$ s trajectory of (a) wild type BrCas12b at 300K, (b) mutated type BrCas12b at 300 K, (c) wild type BrCas12b at 400 K, and (d) mutated type BrCas12b at 400 K, with dark blue presents the space explored by 1  $\mu$ s simulation and other colors present the space explored by replicas.

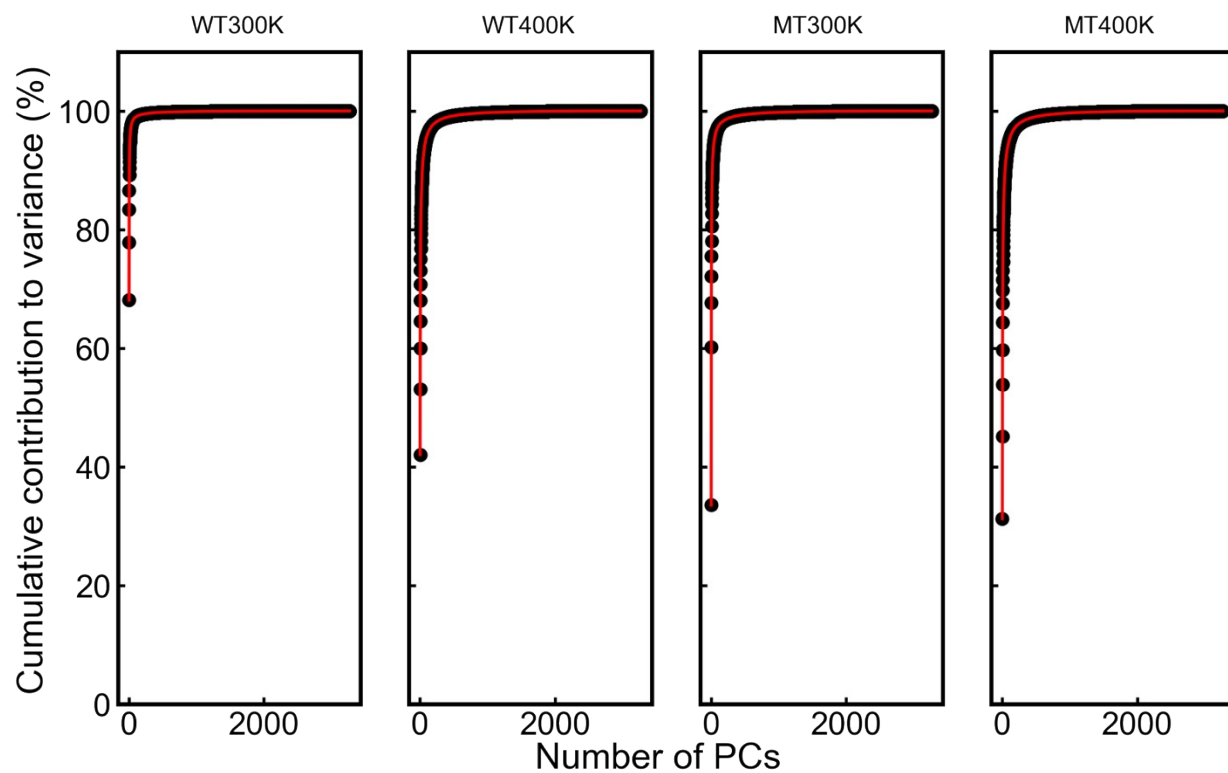

**Figure S14.** Cumulative contribution (%; y-axis) of all the principal components (PCs, x-axis) to the variance of the overall Cas12b motions calculated upon Principal Component Analysis (PCA) of WT and MT BrCas12b at 300 K and 400 K.
